# Supplementary material for: Evaluating perceptions of risk in mosquito experts and identifying undocumented pathways for the introduction of invasive mosquito species into Europe
Source: PubMed Central journal article supplement — Med Vet Entomol. 2018 Nov 14;33(1):78–88. doi: 10.1111/mve.12344 (PMC7380048; doi:10.1111/mve.12344), 2018-11-14
Supplement: MVE-33-78-s001.pdf [file MVE-33-78-s001.pdf]

|                                    |         |
|------------------------------------|---------|
| Surname and name (not obligatory): | Gender: |
| Organization (not obligatory):     | Age:    |
| Country:                           | Region: |

**Knowledge** This questions will evaluate the knowledge of the participant about the pathways for introduction of invasive mosquito species (IMS).

Please circle the correct answer.

|                                                                                                                                                   |     |            |    |
|---------------------------------------------------------------------------------------------------------------------------------------------------|-----|------------|----|
| In Europe, the IMS <i>Ae. albopictus</i> and <i>Ae. aegypti</i> , have been found associated with the import of used tires                        | Yes | Don't know | No |
| In Europe, <i>Ae. koreicus</i> has been found associated with the import of Lucky bamboo ( <i>Dracaena</i> ) plants                               | Yes | Don't know | No |
| Eggs of <i>Ae. aegypti</i> are better capable to survive winters than eggs of <i>Ae. albopictus</i> in Northern Europe                            | Yes | Don't know | No |
| In USA, introduction of <i>Ae. albopictus</i> has not been associated with import of used tires from Asia                                         | Yes | Don't know | No |
| In Europe, there is evidence of <i>Ae. albopictus</i> passive transport with ground road traffic                                                  | Yes | Don't know | No |
| Transport of desiccation resistant eggs is one of the main mechanisms for introduction of <i>Ae. albopictus</i> in Northern Europe                | Yes | Don't know | No |
| In Europe, there is evidence of <i>Ae. albopictus</i> passive transport inside aircrafts                                                          | Yes | Don't know | No |
| <i>Ae. japonicus</i> dispersal in Europe is mainly facilitated by import of Lucky bamboo ( <i>Dracaena</i> ) plants                               | Yes | Don't know | No |
| <i>Ae. albopictus</i> populations are well established in Denmark, and introduction has been found associated with import of used tires from Asia | Yes | Don't know | No |

**Severity** This questions will evaluate perceived seriousness of introductions of IMS in your country/region.

Please circle a score from 1 to 5 whereby: 1 = don't agree at all, 2 = don't agree, 3 = neither agree nor disagree, 4 = agree, 5 = fully agree.

|                                                                                                                                                                              |   |   |   |   |   |
|------------------------------------------------------------------------------------------------------------------------------------------------------------------------------|---|---|---|---|---|
| Introduction of <i>Aedes albopictus</i> in my country /region can lead to irreversible establishment and dispersal of this vector species                                    | 1 | 2 | 3 | 4 | 5 |
| Introduction and establishment of invasive <i>Aedes</i> species in my country/region cannot lead to an increase in the probability for transmission of vector-borne diseases | 1 | 2 | 3 | 4 | 5 |
| Despite the surveillance and control measures, unnoticed introductions of <i>Aedes</i> invasive species in my country/region can pose a risk for human and veterinary health | 1 | 2 | 3 | 4 | 5 |
| I think that introduction and spread of invasive <i>Aedes</i> species is not really a serious problem in Europe                                                              | 1 | 2 | 3 | 4 | 5 |

**Vulnerability** This questions will evaluate the perceived vulnerability of your country/region for introduction of IMS with different known pathways.

Please circle a score from 1 to 5 whereby: 1 = don't agree at all, 2 = don't agree, 3 = neither agree nor disagree, 4 = agree, 5 = fully agree.

|                                                                                                                                                     |   |   |   |   |   |
|-----------------------------------------------------------------------------------------------------------------------------------------------------|---|---|---|---|---|
| The chance of introduction of <i>Aedes</i> invasive species in my country/region with import of used tires is rather large                          | 1 | 2 | 3 | 4 | 5 |
| The chance of introduction of <i>Aedes</i> invasive species in my country /region with import of lucky bamboo is rather large                       | 1 | 2 | 3 | 4 | 5 |
| The chance of introduction of <i>Aedes</i> invasive species in my country/region with passive ground transport is rather large                      | 1 | 2 | 3 | 4 | 5 |
| The chance of introduction of <i>Aedes</i> invasive species in my country/region with passive transport with maritime ferry traffic is rather large | 1 | 2 | 3 | 4 | 5 |
| The chance of introduction of <i>Aedes</i> invasive species in my country/region with passive transport inside aircrafts is rather large            | 1 | 2 | 3 | 4 | 5 |
| The chance of introduction of <i>Aedes</i> invasive species in my country/region via natural dispersal from neighbouring regions is rather large    | 1 | 2 | 3 | 4 | 5 |

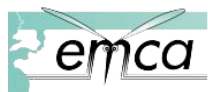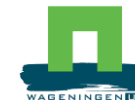

**Response-efficacy** These questions will evaluate the perceived efficacy of the surveillance and control measures for IMS introductions in your country/region.

Please circle a score from 1 to 5 whereby: 1 = don't agree at all, 2 = don't agree, 3 = neither agree nor disagree, 4 = agree, 5 = fully agree.

|                                                                                                            |   |   |   |   |   |
|------------------------------------------------------------------------------------------------------------|---|---|---|---|---|
| Invasive <i>Aedes</i> species surveillance and control measures implemented in my country/region leads to: |   |   |   |   |   |
| • Accurate evaluation of potential introduction locations for <i>Aedes</i> species                         | 1 | 2 | 3 | 4 | 5 |
| • Early detection of invasive <i>Aedes</i> species at the locations                                        | 1 | 2 | 3 | 4 | 5 |
| • Certainty about the invasive <i>Aedes</i> species present in the country                                 | 1 | 2 | 3 | 4 | 5 |
| • Early elimination of newly detected foci                                                                 | 1 | 2 | 3 | 4 | 5 |

**Action tendencies** These questions will evaluate the action tendencies/attitudes regarding implementation of IMS surveillance and control measures in your country/region.

Please circle a score from 1 to 5 whereby: 1 = don't agree at all, 2 = don't agree, 3 = neither agree nor disagree, 4 = agree, 5 = fully agree.

|                                                                                                                                                |   |   |   |   |   |
|------------------------------------------------------------------------------------------------------------------------------------------------|---|---|---|---|---|
| To what extent do you agree that IMS surveillance needs to be implemented in all countries/regions of Europe?                                  | 1 | 2 | 3 | 4 | 5 |
| To what extent do you agree that invasive <i>Aedes</i> species needs to be controlled?                                                         | 1 | 2 | 3 | 4 | 5 |
| To what extent do you agree that invasive <i>Aedes</i> species needs to be eradicated in Europe?                                               | 1 | 2 | 3 | 4 | 5 |
| To what extent do you agree funds need to be invested in surveillance and control of invasive <i>Aedes</i> species?                            | 1 | 2 | 3 | 4 | 5 |
| To what extent do you agree funds need to be invested in management for preventing introductions of IMS in risk locations?                     | 1 | 2 | 3 | 4 | 5 |
| To what extent do you agree that common EU legislation should be put in place to allow biological control products (e.g. Bti) in your country? | 1 | 2 | 3 | 4 | 5 |

**Constraints** These questions will evaluate the perceived constraints with respect to implementation of IMS surveillance in your country/region.

Please circle a score from 1 to 5 whereby: 1 = don't agree at all, 2 = don't agree, 3 = neither agree nor disagree, 4 = agree, 5 = fully agree.

|                                                                                                                      |   |   |   |   |   |
|----------------------------------------------------------------------------------------------------------------------|---|---|---|---|---|
| In my country/region, adequate surveillance of invasive <i>Aedes</i> species will be difficult to implement because: |   |   |   |   |   |
| • Lack of interest of the governmental organizations                                                                 | 1 | 2 | 3 | 4 | 5 |
| • Lack of budget                                                                                                     | 1 | 2 | 3 | 4 | 5 |
| • Lack of perception of risk of introductions                                                                        | 1 | 2 | 3 | 4 | 5 |
| • Lack of organized vector surveillance teams                                                                        | 1 | 2 | 3 | 4 | 5 |
| • Other: Lack of.....                                                                                                | 1 | 2 | 3 | 4 | 5 |

|                                                                                                                                                                                                                                                                                                              |                                                         |
|--------------------------------------------------------------------------------------------------------------------------------------------------------------------------------------------------------------------------------------------------------------------------------------------------------------|---------------------------------------------------------|
| <p><b>Introduction pathways</b><br/>         Apart of the above mentioned possible pathways for introduction of invasive <i>Aedes</i> species, other potential pathways for introduction could exist and never been reported. Please, <u>indicate at least one pathway</u> in your region/country: _____</p> | <p><b>General comments</b> (any comment is welcome)</p> |
|--------------------------------------------------------------------------------------------------------------------------------------------------------------------------------------------------------------------------------------------------------------------------------------------------------------|---------------------------------------------------------|
