# Supplementary figures and images for: Evaluating perceptions of risk in mosquito experts and identifying undocumented pathways for the introduction of invasive mosquito species into Europe
Source: PubMed Central journal article supplement — Med Vet Entomol. 2018 Nov 14;33(1):78–88. doi: 10.1111/mve.12344 (PMC7380048; doi:10.1111/mve.12344), 2018-11-14

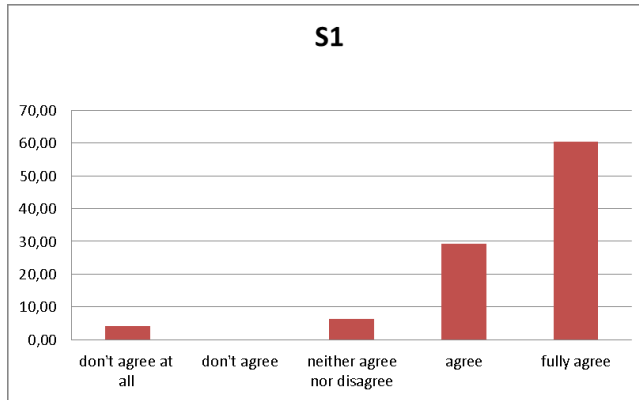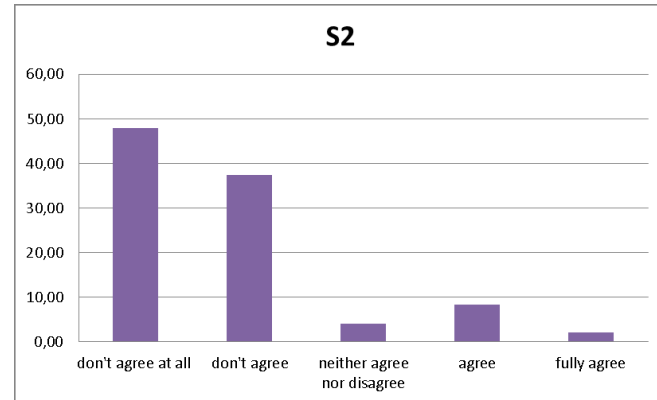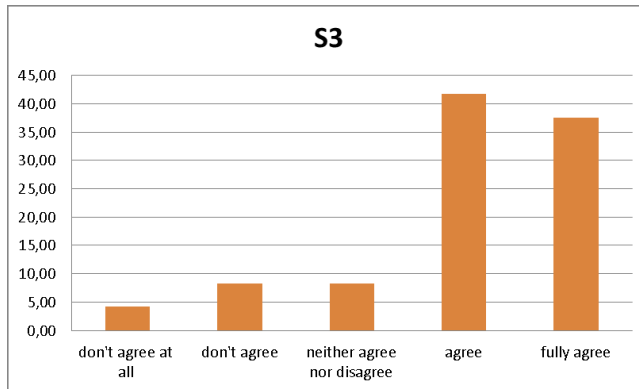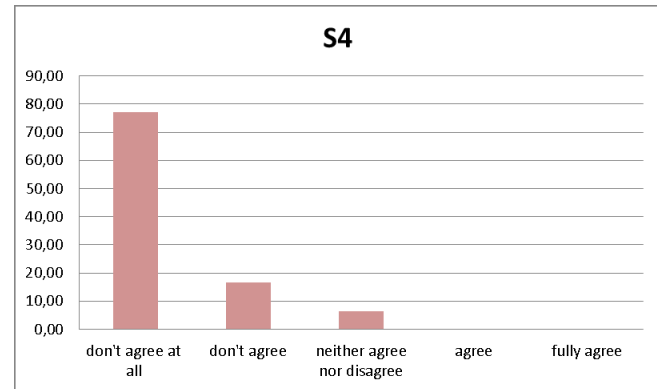

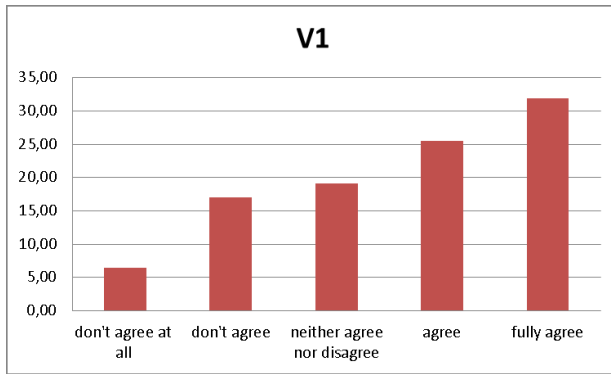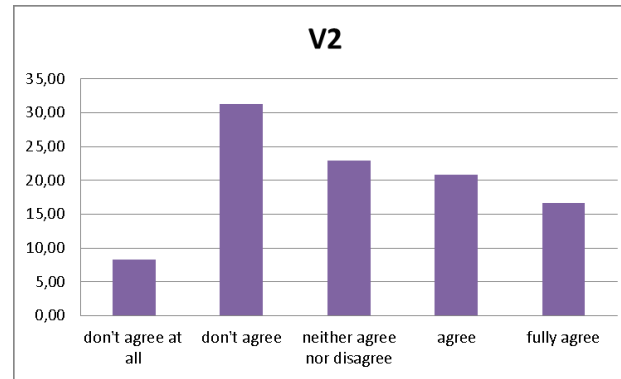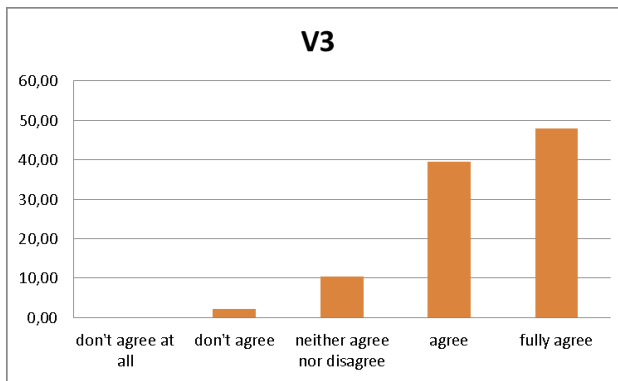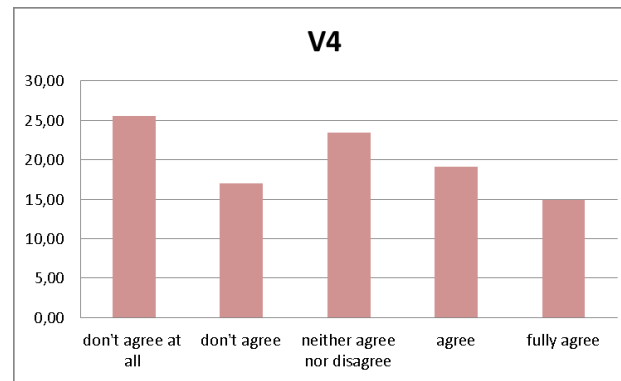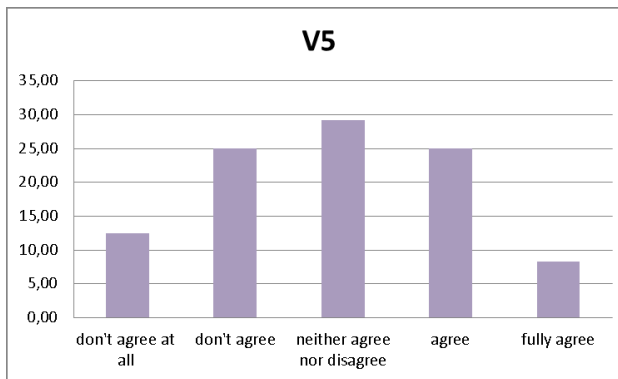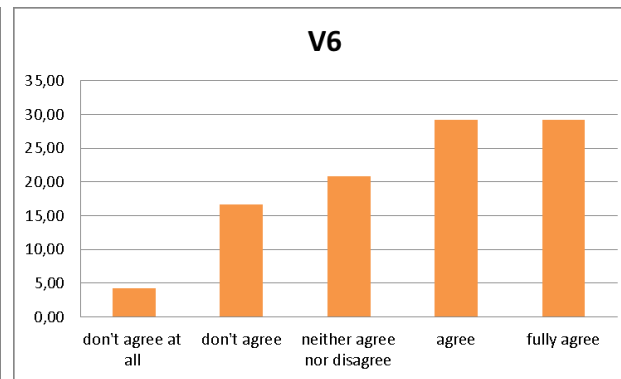

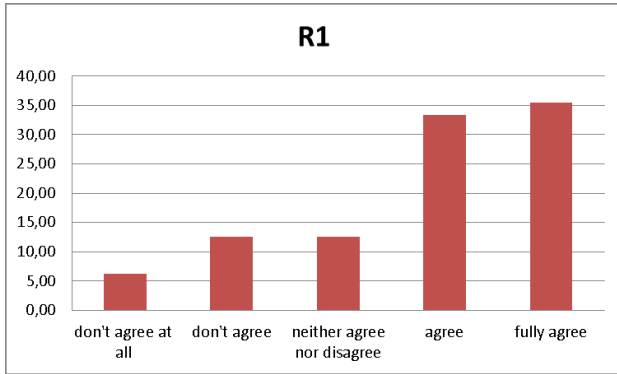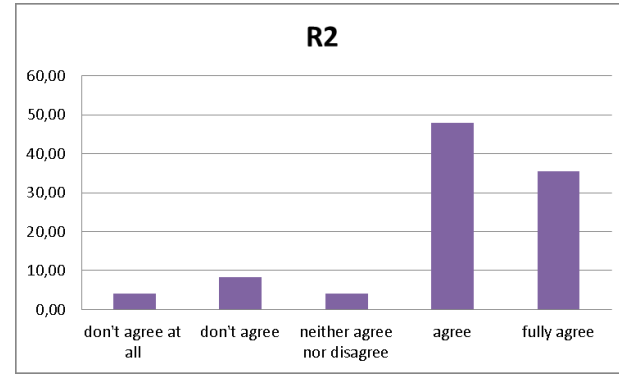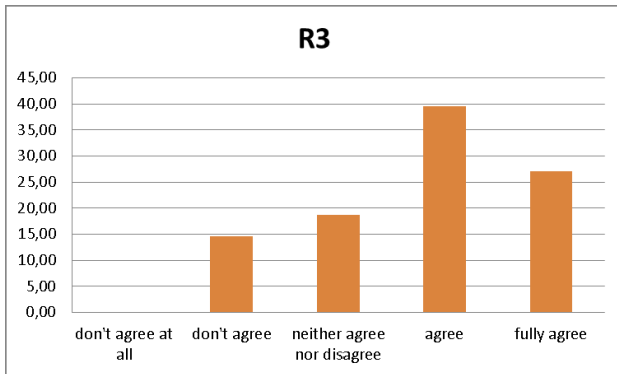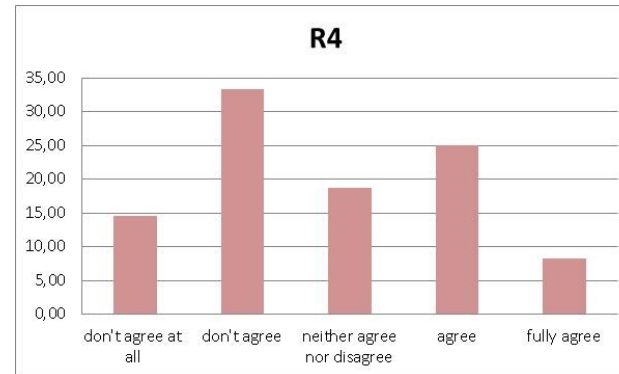

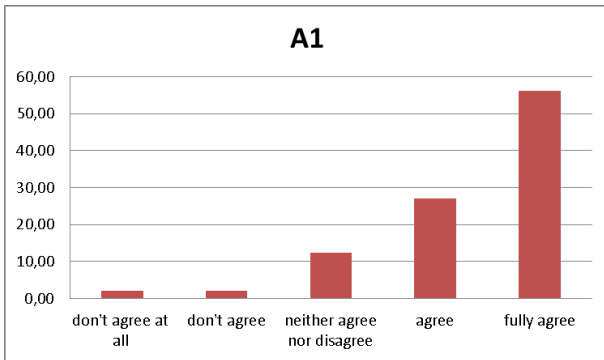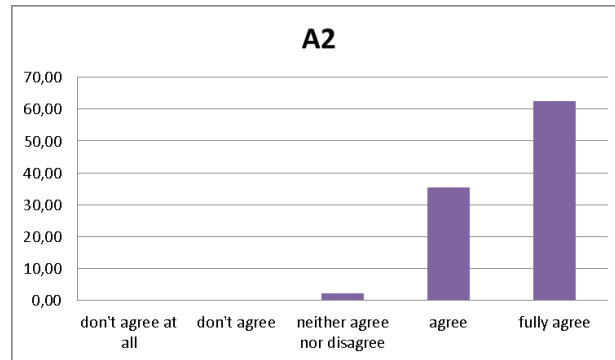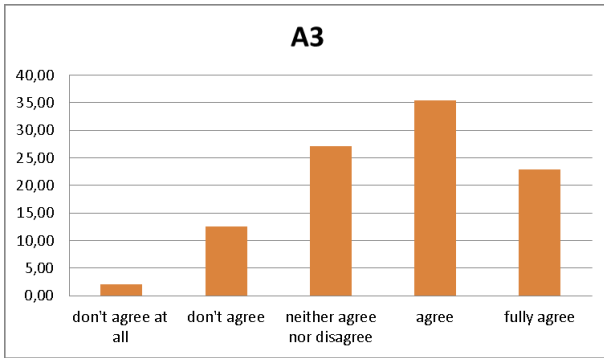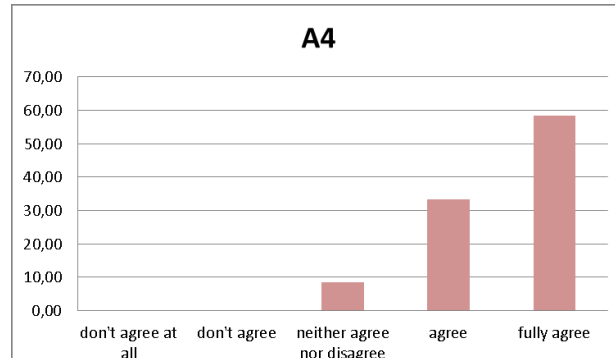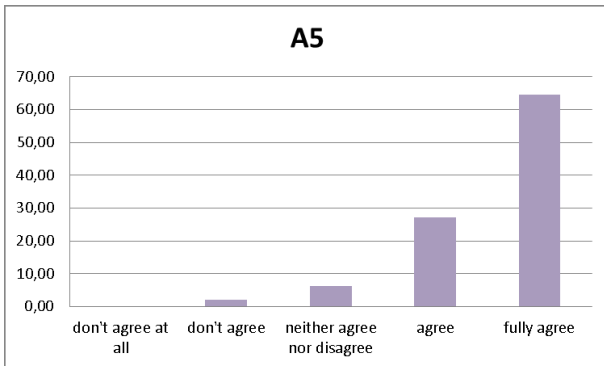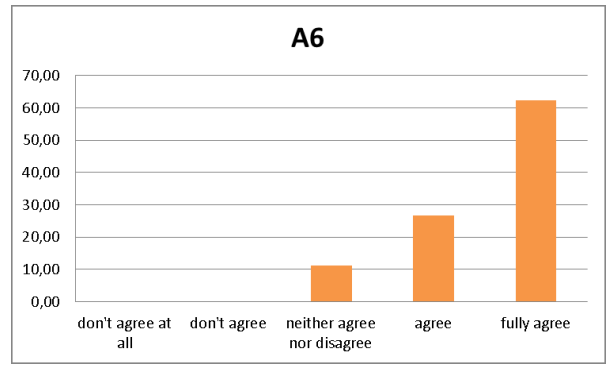

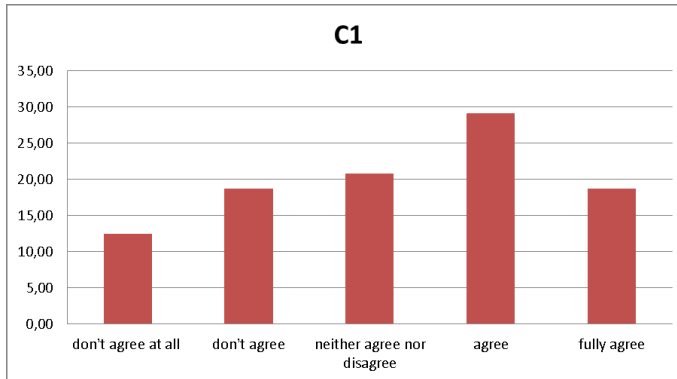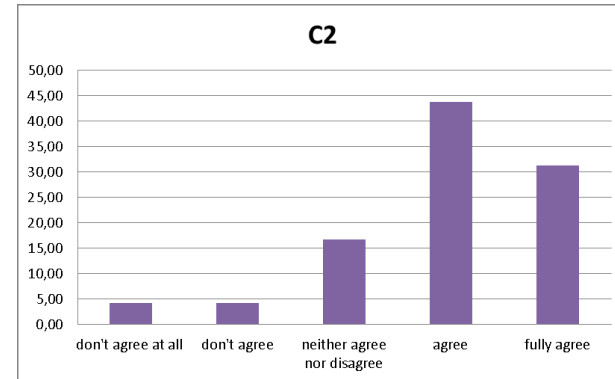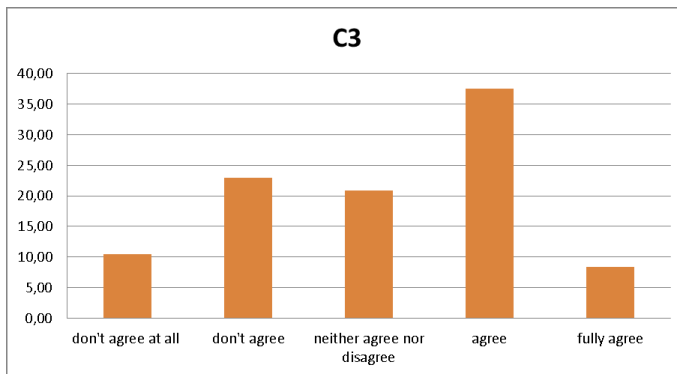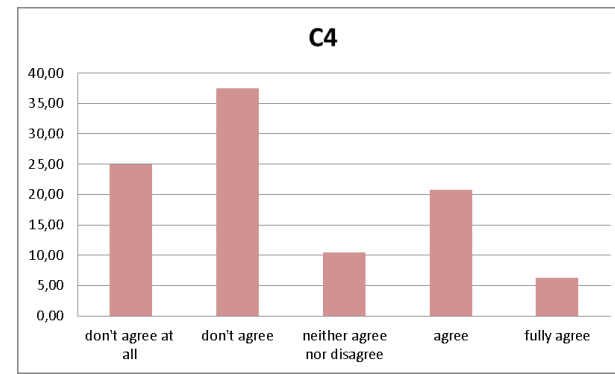

Supplement: MVE-33-78-s002.pdf [file MVE-33-78-s002.pdf]
